# Supplementary material for: RETRACTED ARTICLE: Sulforaphane induces S-phase arrest and apoptosis via p53-dependent manner in gastric cancer cells
Source: PubMed Central journal article supplement (PMC7843980; doi:10.1038/s41598-021-81815-2), 2021-01-28
Supplement: 41598_2021_81815_MOESM1_ESM.pdf [file 41598_2021_81815_MOESM1_ESM.pdf]

## **Sulforaphane induces S-phase arrest and apoptosis via p53-dependent manner in gastric cancer cells**

Yuan Wang<sup>1</sup>, Huazhang Wu<sup>2,\*</sup>, Nannan Dong<sup>1</sup>, Xu Su<sup>2</sup>, Mingxiu Duan<sup>1</sup>, Yaqin Wei<sup>3</sup>, Jun Wei<sup>4</sup>, Gaofeng Liu<sup>2</sup>, Qingjie Peng<sup>2</sup>, & Yunli Zhao<sup>1,\*</sup>

<sup>1</sup> School of Public Health, Bengbu Medical College, Bengbu, 233030, China

<sup>2</sup> School of Life Science, Anhui Province Key Laboratory of Translational Cancer Research, Bengbu Medical College, Bengbu, 233030, China

<sup>3</sup> School of Clinical Medicine, Bengbu Medical College, Bengbu, 233030, China

<sup>4</sup> Department of Gastroenterology, the First Affiliated Hospital of Bengbu Medical College, Bengbu, Anhui 233030, P. R. China

\* Correspondence Author:

Huazhang Wu, Ph.D, School of Life Science, Anhui Province Key Laboratory of Translational Cancer Research, Bengbu Medical College, Bengbu, 233030, China.

E-mail: [whzhang1025@163.com](mailto:whzhang1025@163.com)

Yunli Zhao, Ph.D, School of Public Health, Bengbu Medical College, Bengbu, Anhui 233030, P. R. China.

E-mail: [yunli201@126.com](mailto:yunli201@126.com)

Figure 5A

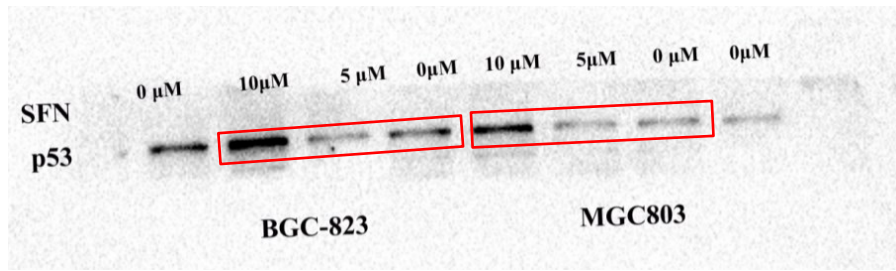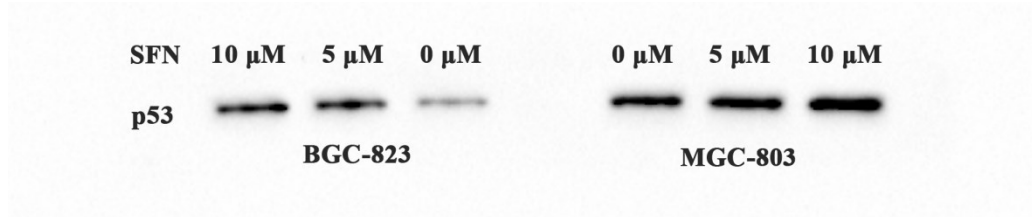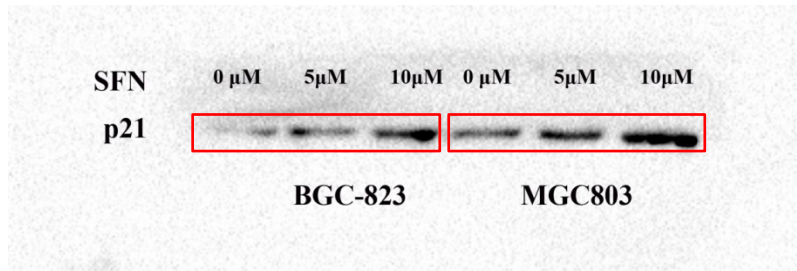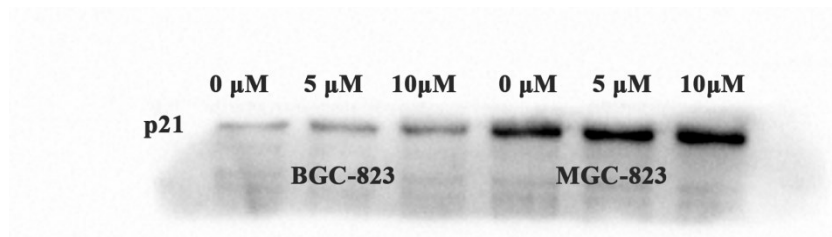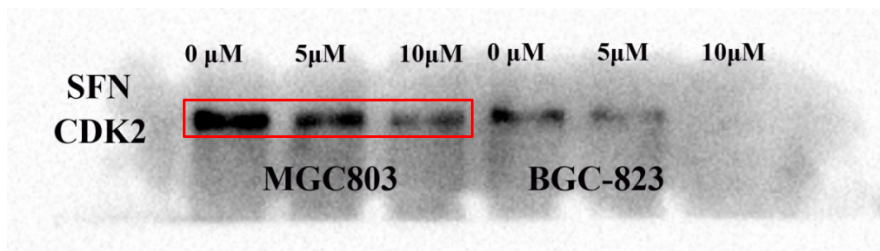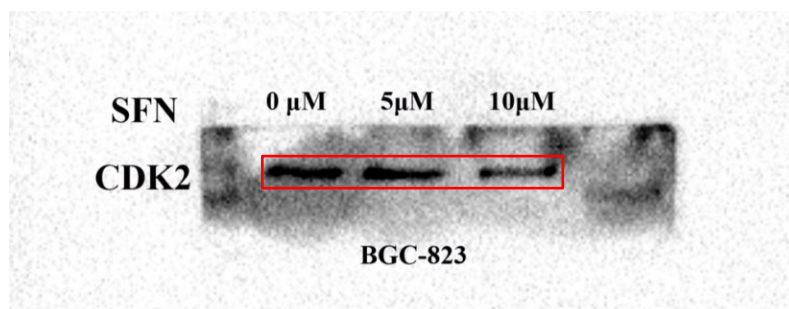

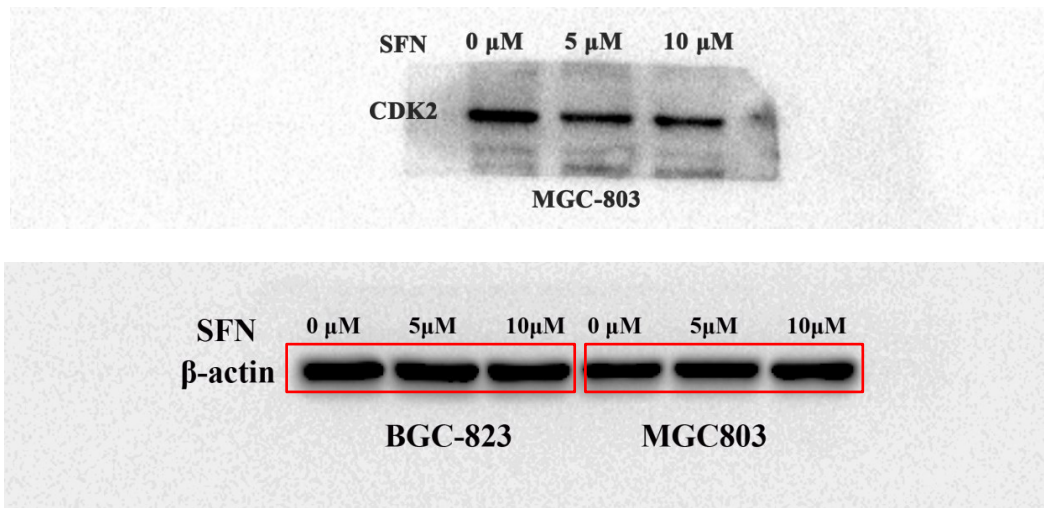

The S phase arrest associated proteins p53, p21 and CDK2 associated proteins were examined by western blot analysis after treated with the increased concentration of SFN for 48 h in BGC-823 and MGC-803 cells. Relevant experiment is marked with a red box and lanes have been labeled to match the main text. These data are presented in Figure 5A.

**Figure 5 B**

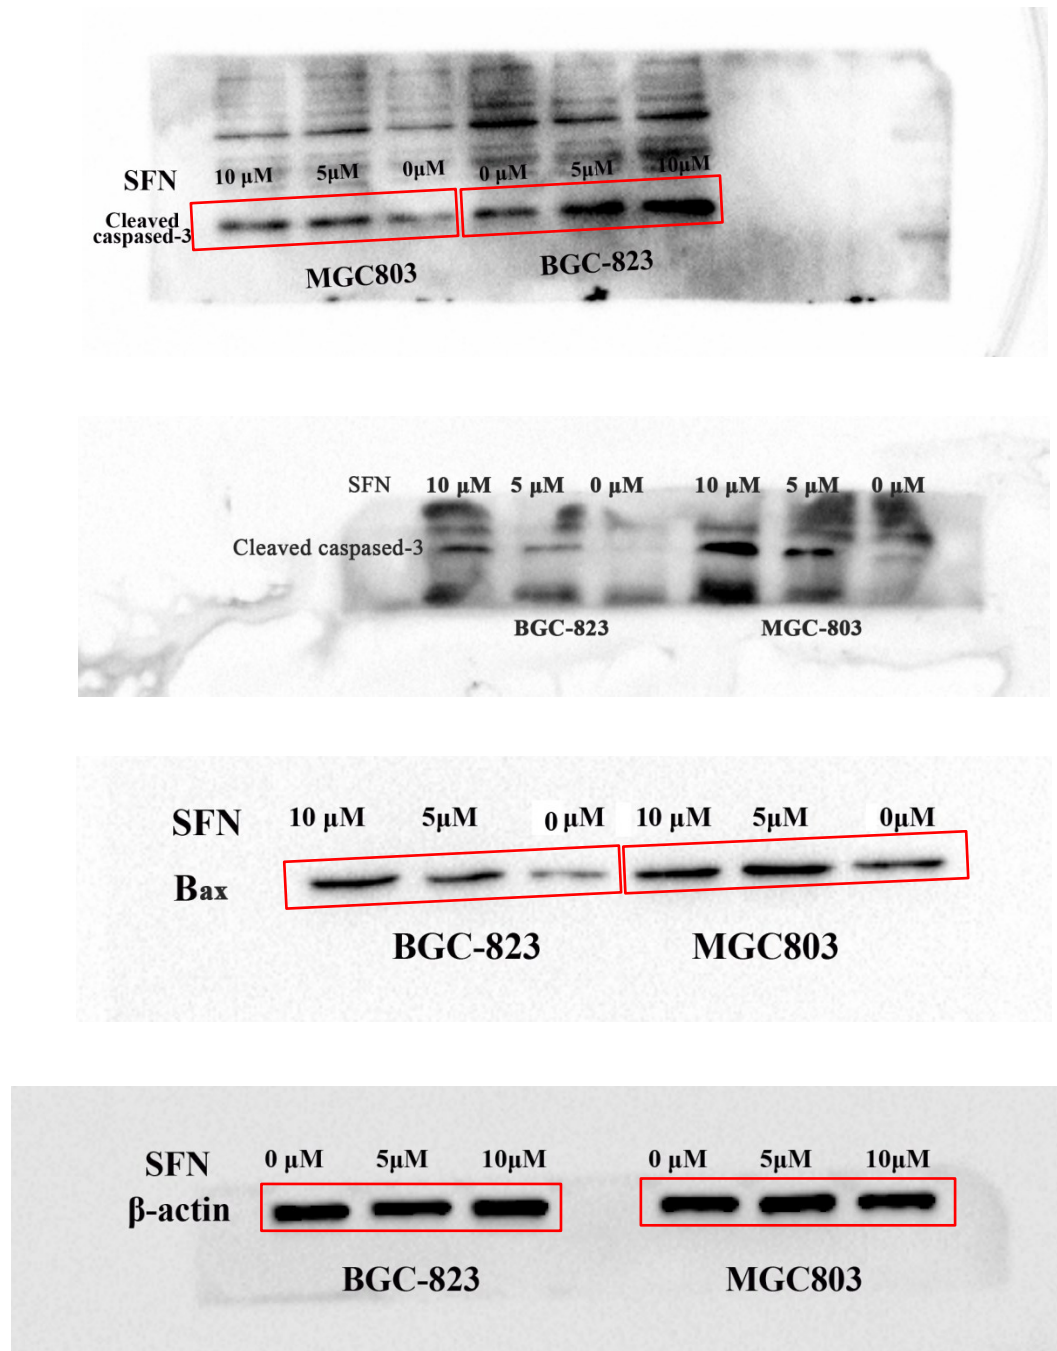

Western blotting (Truncated-length of PVDF membranes but including target proteins) was used to analyze the effect of SFN on the expression of apoptosis-related proteins caspase-3 and Bax in BGC-823 and MGC-803 cells. Relevant experiment is marked with a red box and lanes have been labeled to match the main text. These data are presented in Figure 5B.

Figure 5 C

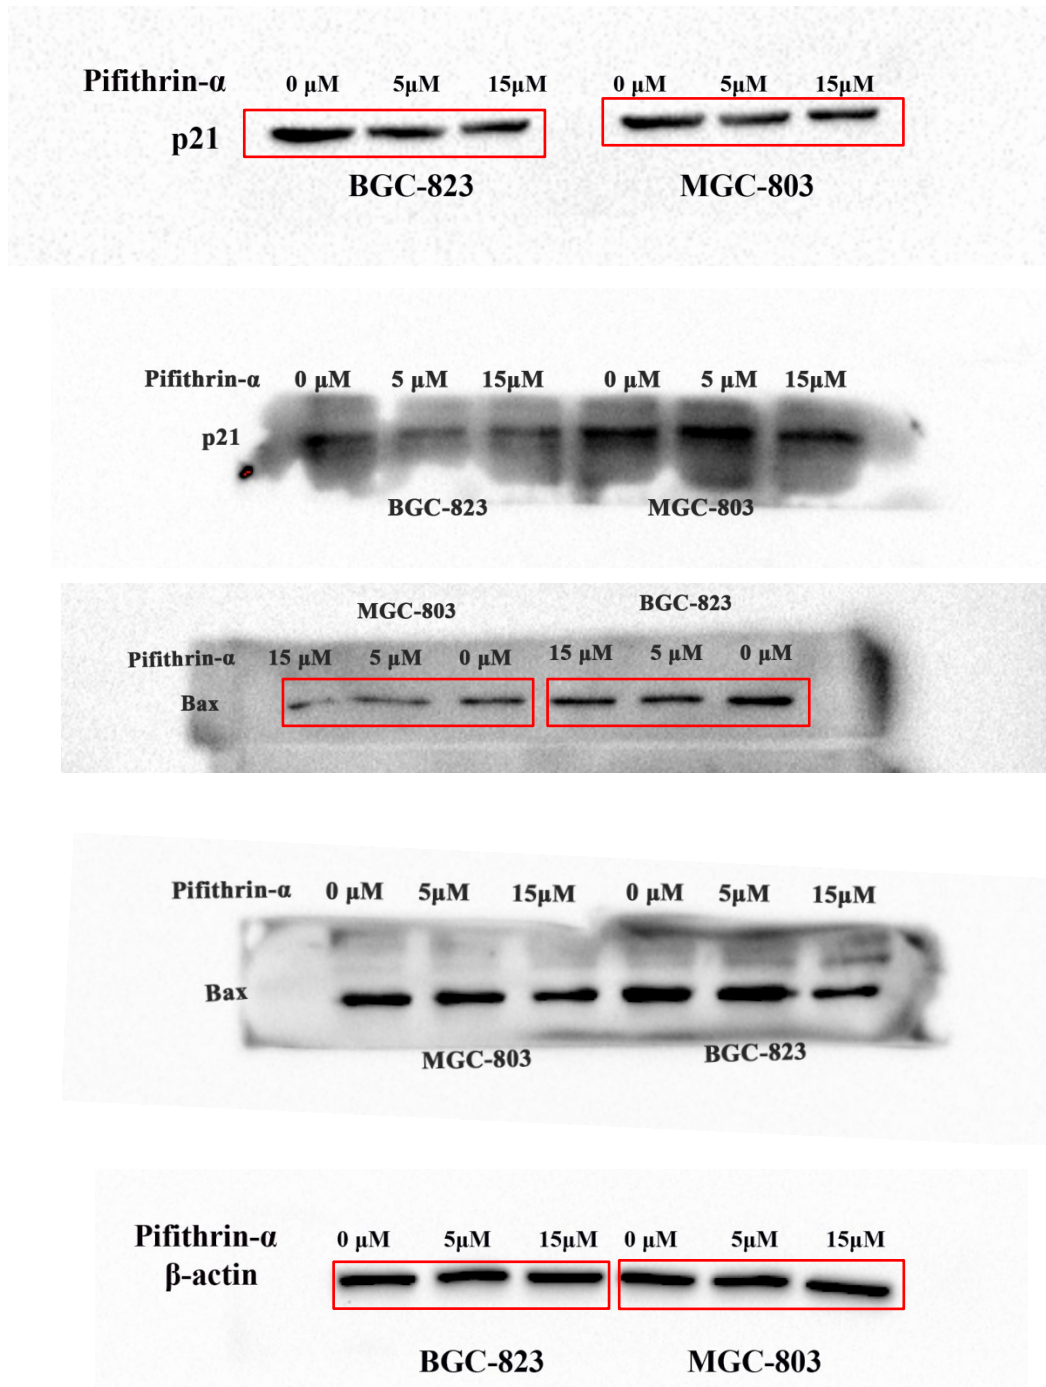

Western blotting (Truncated-length of PVDF membranes but including target proteins) was used to analyze the effect of Pifithrin- $\alpha$  on the expression of apoptosis-related proteins caspase-3 and Bax in BGC-823 and MGC-803 cells. Relevant experiment is marked with a red box and lanes have been labeled to match the main text. These data are presented in Figure 5C.
